# Supplementary material for: Mass Accommodation and Gas-Particle Partitioning in Secondary Organic Aerosols: Dependence on Diffusivity, Volatility, Particle-phase Reactions, and Penetration Depth
Source: Copernicus journal article supplement (doi:10.5194/acp-2020-536), 2020-07-07
Supplement: Supplementary file 1 [file acp-2020-536-supplement.pdf]

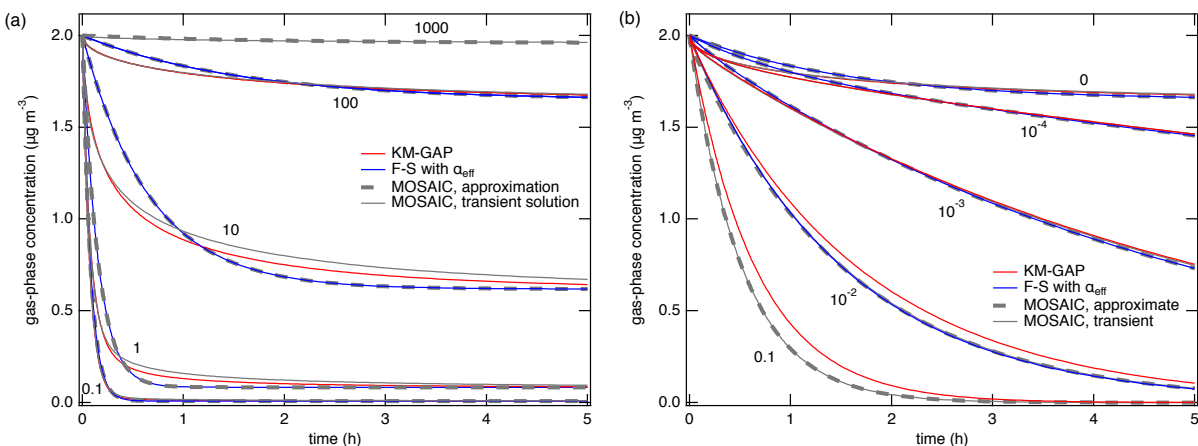

1  
 2 **Figure S1.** Temporal evolution of the gas phase concentration of organic compounds interacting  
 3 with semisolid seed aerosol particles under the same conditions as in Fig. 2 but with  $\alpha_s = 0.1$   
 4 instead of 1. (a) Non-reactive partitioning of compounds with different volatilities ( $C^0 = 0.1$  to  
 5  $1000 \mu\text{g m}^{-3}$ ) and (b) partitioning of semi-volatile compounds ( $C^0 = 100 \mu\text{g m}^{-3}$ ) undergoing  
 6 particle-phase reactions with different first-order loss rate coefficients ( $k_b = 10^{-4}$  to  $0.1 \text{ s}^{-1}$ ). The  
 7 red lines are simulated with KM-GAP and the blue lines are simulated by an aerosol dynamic  
 8 model that employs the Fuchs-Sutugin approximation with  $\alpha_{\text{eff}}$  for non-reactive partitioning (a)  
 9 and for reactive uptake (b). The gray lines represent the MOSAIC approximate (dashed) and  
 10 transient solutions (solid) (Zaveri et al., 2014).
